# Supplementary material for: The cost of a euploid embryo identified from preimplantation genetic testing for aneuploidy (PGT-A): a counseling tool
Source: Springer Nature journal article supplement (doi:10.1007/s10815-018-1275-5), 2018-07-31
Supplement: MOESM1 [file 15991556]

**Supplemental Table 1:** The probability of having a euploid blastocyst based on age and the corresponding number of biopsiable blastocysts needed to attain a 50%, 75%, or 90% likelihood of having a euploid embryo

|  | | **No. biopsiable blastocysts needed to attain euploid embryo** | | |
| --- | --- | --- | --- | --- |
| **Age** | **p(euploid)** | **50% likelihood** | **75% likelihood** | **90% likelihood** |
| **<35** | 0.533 | 1 | 2 | 4 |
| **35** | 0.471 | 2 | 3 | 4 |
| **36** | 0.462 | 2 | 3 | 4 |
| **37** | 0.424 | 2 | 3 | 5 |
| **38** | 0.377 | 2 | 3 | 5 |
| **39** | 0.326 | 2 | 4 | 6 |
| **40** | 0.29 | 3 | 5 | 7 |
| **41** | 0.231 | 3 | 6 | 9 |
| **42** | 0.188 | 4 | 7 | 12 |
| **43** | 0.159 | 5 | 9 | 14 |
| **44** | 0.127 | 6 | 11 | 17 |

**Supplemental Table 2A:** Cost in thousands to achieve a 50% likelihood of live birth

|  | **AMH (ng/mL)** | | | | | | | |
| --- | --- | --- | --- | --- | --- | --- | --- | --- |
| **Age (y)** | **0.1** | **0.3** | **0.5** | **1** | **2** | **3** | **5** | **10** |
| **30** | $44K | $22K | $21K | $18K | $17K | $16K | $16K | $16K |
| **35** | $46K | $38K | $35K | $20K | $17K | $16K | $16K | $15K |
| **36** | $46K | $38K | $35K | $20K | $17K | $16K | $16K | $15K |
| **37** | $65K | $38K | $36K | $20K | $18K | $16K | $16K | $15K |
| **38** | $66K | $38K | $36K | $33K | $19K | $18K | $17K | $15K |
| **39** | $87K | $56K | $36K | $33K | $31K | $18K | $18K | $16K |
| **40** | $87K | $56K | $53K | $33K | $31K | $30K | $18K | $17K |
| **41** | $109K | $75K | $53K | $50K | $32K | $31K | $29K | $18K |
| **42** | $152K | $94K | $71K | $50K | $47K | $31K | $30K | $28K |
| **43** | $195K | $112K | $88K | $66K | $47K | $45K | $30K | $29K |
| **44** | $239K | $131K | $106K | $82K | $62K | $48K | $44K | $30K |

**Supplemental Table 2B:** Cost in thousands to achieve a 75% likelihood of live birth

|  | **AMH (ng/mL)** | | | | | | | |
| --- | --- | --- | --- | --- | --- | --- | --- | --- |
| **Age (y)** | **0.1** | **0.3** | **0.5** | **1** | **2** | **3** | **5** | **10** |
| **30** | $66K | $40K | $36K | $33K | $21K | $19K | $18K | $18K |
| **35** | $87K | $57K | $53K | $34K | $31K | $30K | $20K | $18K |
| **36** | $109K | $57K | $53K | $36K | $32K | $31K | $21K | $18K |
| **37** | $109K | $75K | $53K | $38K | $32K | $31K | $29K | $18K |
| **38** | $130K | $75K | $56K | $50K | $34K | $31K | $30K | $20K |
| **39** | $152K | $94K | $71K | $52K | $47K | $33K | $30K | $29K |
| **40** | $174K | $97K | $88K | $66K | $47K | $45K | $32K | $29K |
| **41** | $217K | $131K | $106K | $82K | $62K | $48K | $44K | $31K |
| **42** | $282K | $169K | $141K | $99K | $78K | $61K | $47K | $42K |
| **43** | $347K | $206K | $159K | $116K | $93K | $75K | $59K | $45K |
| **44** | $456K | $262K | $212K | $148K | $109K | $91K | $73K | $57K |

**Supplemental Table 2C:** Cost in thousands to achieve a 90% likelihood of live birth

|  | **AMH (ng/mL)** | | | | | | | |
| --- | --- | --- | --- | --- | --- | --- | --- | --- |
| **Age (y)** | **0.1** | **0.3** | **0.5** | **1** | **2** | **3** | **5** | **10** |
| **30** | $109K | $64K | $54K | $39K | $34K | $33K | $30K | $21K |
| **35** | $152K | $94K | $71K | $52K | $47K | $35K | $32K | $29K |
| **36** | $152K | $94K | $73K | $53K | $47K | $36K | $32K | $29K |
| **37** | $174K | $102K | $88K | $66K | $47K | $46K | $34K | $31K |
| **38** | $217K | $118K | $91K | $69K | $52K | $46K | $44K | $32K |
| **39** | $239K | $150K | $109K | $83K | $63K | $60K | $45K | $36K |
| **40** | $282K | $169K | $126K | $99K | $78K | $61K | $50K | $43K |
| **41** | $369K | $206K | $176K | $121K | $93K | $78K | $61K | $47K |
| **42** | $477K | $281K | $212K | $151K | $111K | $93K | $76K | $59K |
| **43** | $586K | $337K | $265K | $185K | $140K | $120K | $102K | $73K |
| **44** | $759K | $449K | $335K | $246K | $186K | $150K | $117K | $87K |

**Supplemental Tables 2A-C:** Ten-thousand Monte Carlo simulations per cell were used to estimate the treatment cost to obtain a 50%, 75% or 90% likelihood of having a live birth, assuming 60% likelihood of live birth following transfer of a euploid blastocyst. This includes the cost of frozen embryo transfers. In these models, each frozen embryo transfer is assumed to add $2,500 to the overall treatment cost. Results are rounded to the nearest $1,000.

Redder cells indicate higher cost estimates, while greener cells indicate lower cost estimates.

**Supplemental Table 3**: Raw counts for each and age and AMH combination

|  | **AMH (ng/mL)** | | | | | | | |  |
| --- | --- | --- | --- | --- | --- | --- | --- | --- | --- |
| **Age (y)** | **<0.1** | **0.1-0.3** | **0.4-0.5** | **0.6-1.0** | **1.1-2.0** | **2.1-3.0** | **3.1-5.0** | **5.1-10.0** | **>10.0** |
| **<35** | 0 | 2 | 3 | 6 | 14 | 23 | 28 | 24 | 13 |
| **35** | 0 | 0 | 1 | 1 | 7 | 1 | 4 | 5 | 1 |
| **36** | 0 | 1 | 2 | 2 | 1 | 5 | 1 | 6 | 2 |
| **37** | 0 | 1 | 2 | 8 | 4 | 4 | 6 | 2 | 1 |
| **38** | 0 | 3 | 4 | 2 | 10 | 3 | 7 | 6 | 1 |
| **39** | 1 | 0 | 0 | 5 | 7 | 4 | 6 | 3 | 0 |
| **40** | 0 | 0 | 1 | 3 | 6 | 1 | 7 | 1 | 2 |
| **41** | 0 | 0 | 1 | 7 | 9 | 4 | 5 | 3 | 0 |
| **42** | 0 | 0 | 2 | 3 | 3 | 4 | 4 | 2 | 1 |
| **43** | 0 | 0 | 0 | 2 | 3 | 0 | 3 | 1 | 0 |
| **44** | 0 | 0 | 0 | 1 | 5 | 1 | 1 | 1 | 0 |
